# Supplementary material
Source: publisher figshare collection journal article supplement (https://karger.figshare.com/articles/dataset/_/5121805)
Supplement: Supplementary file 1 [file 1 › 000326770_sm_Figures.pdf]

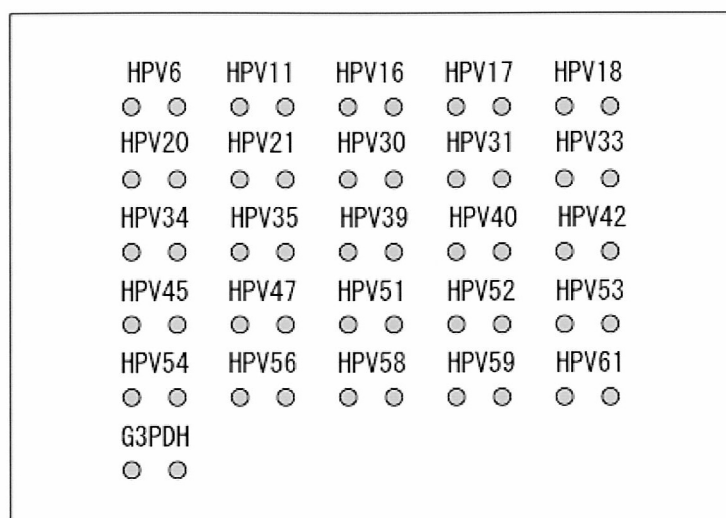

Supplementary Figure 1

Supplementary Figure 1. Schematic presentation of the HPV-DNA array.

Each membrane contains duplicate spots in which the target sequences of the 25 HPV genotypes and G3PDH gene are blotted. The G3PDH gene is the internal control for amplification.

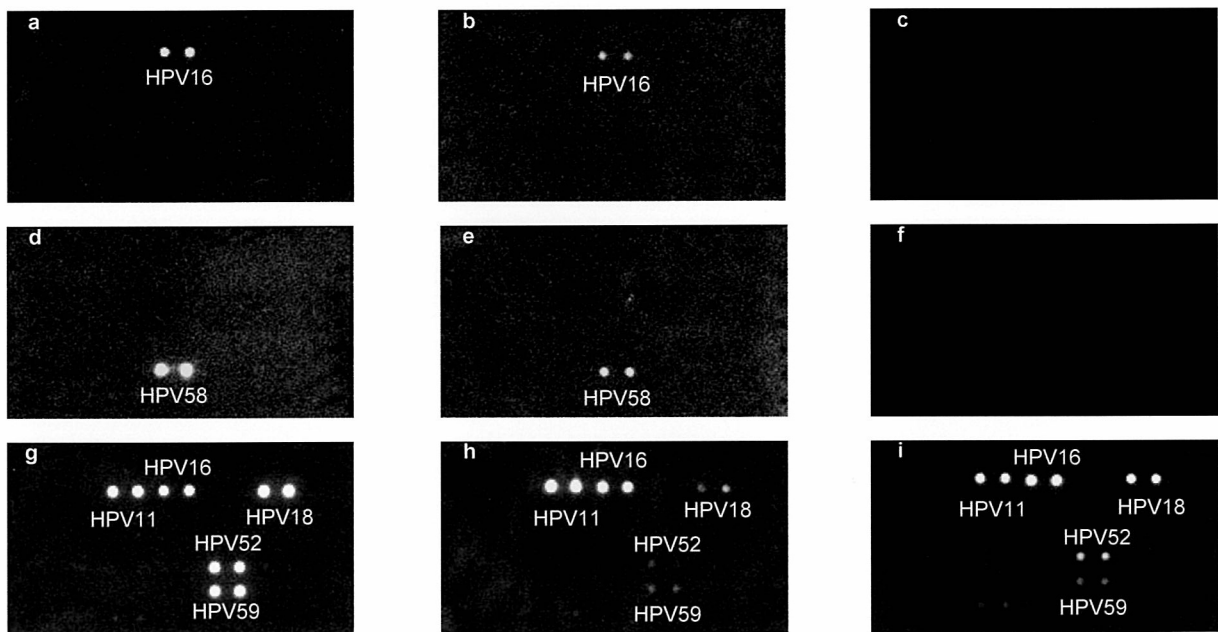

Supplementary Figure 2

Supplementary Figure 2. Sensitivity of the HPV-DNA array.

To determine the sensitivity of the HPV-DNA array system, the following amount of templates were applied for probe labeling; a: HPV-16 10 pg , b: HPV-16 100 fg , c: HPV-16 10 fg , d: HPV-58 10 pg , e: HPV-58 100 fg , f: HPV-58 10 fg , g: HPV-11 1 ng + HPV-16 1 ng + HPV-18 1 ng + HPV-52 1 ng + HPV-59 1 ng, h: HPV-11 1 ng + HPV-16 1 ng + HPV-18 50 fg + HPV-52 50 fg + HPV-59 100 fg , i: HPV-11 100 fg + HPV-16 1 ng + HPV-18 100 fg + HPV-52 50 fg + HPV-59 50 fg, followed by hybridization with the array membrane. Even when multiple genotypes were present in the templates, signals could be detected if the amount of DNA from each genotype reached 50 fg.
