# Supplementary material
Source: publisher figshare collection journal article supplement (https://karger.figshare.com/articles/dataset/_/5121805)
Supplement: Supplementary file 1 [file 1 › 000326770_sm_Table.pdf]

**Supplementary Table 1.** Primers used for the HPV-DNA array.

| HPV<br>genotype | Sequence              |                       | Amplicon<br>size (bp) |
|-----------------|-----------------------|-----------------------|-----------------------|
|                 | Forward primer        | Reverse primer        |                       |
| HPV6            | GTGTGTTACTGTCCCGCTTG  | GGGGCATGTTCCAGTGAGTT  | 401                   |
| HPV11           | CCCAAGCCTGCTATTACTGG  | GGGGTCCGTAACCTGTACCT  | 480                   |
| HPV16           | GTGGGGGAGAGGGTGTTAGT  | ATCCATTCTGGCGTGTCTCC  | 496                   |
| HPV17           | AGTAGGCCTTCACGCTTGGT  | CCAGCTGAGACCCACTAAAG  | 496                   |
| HPV18           | AGACACAGGGTTCGGATATGG | CTGCTGTTGTTGCCCTCTGT  | 414                   |
| HPV20           | CGGCCCCCTCCGATATTATAC | CCTCCTCTACGCCTGAACAC  | 501                   |
| HPV21           | CAGACAGTGCTGACGAAGGT  | CCTTTCCAAGAGCCTCTCAC  | 460                   |
| HPV30           | CACGCCACCACAGCAAATAC  | GGCAGTCCTGAAAACCTGTGC | 497                   |
| HPV31           | TAGATCAGGCACGGTTGGTG  | GCCTGTGAGGTGACAAACCT  | 489                   |
| HPV33           | ACCGGGTGCTGATAATAGGG  | CGGGAACAGCCTCTCCTAAT  | 401                   |
| HPV34           | GGCAGGTACTGTAGGCGATG  | TGAAGGCGGTGGTGTAAGAC  | 451                   |
| HPV35           | GGACGGGATGTAATGGATGG  | GTCTCGCGTTGGAGTCTCAT  | 500                   |
| HPV39           | GAGCACATCAGCAGGTTTCGT | GTAGTGCCCGAATCCCTTGT  | 439                   |
| HPV40           | GCTGCAGGACACAAGTCAAG  | TGCCCACAGTAGTGGTGATG  | 491                   |
| HPV42           | CTGCACCTGACCCTGATTTC  | GTA CTGTCCCATGGGTGGTC | 469                   |
| HPV45           | CCAGGTGGTGCCTCCTATTA  | GGAGGCGTGTTGTAGCTGTC  | 496                   |
| HPV47           | CCTGTCGAGCCTACTGCTTC  | CGCCTTACTGCAGAGGCTAC  | 455                   |
| HPV51           | GCCATAGTCAGGCAAACGAG  | CTGCTACCATTGGGGAAACG  | 381                   |
| HPV52           | TGTCCTCCCCTACAGCTCAT  | CTGCGCACGTTGTAACCAGT  | 405                   |
| HPV53           | GGAGGATGGGTGGTGTAAAG  | GTTCCCTGCGACACACTCTG  | 394                   |
| HPV54           | GGACCTCCAGACACAGGAAA  | AGAAGCCTTTCCTGGCACAC  | 513                   |
| HPV56           | GGCTAAGTGGCCATCCATTG  | GGGGGTTCTCTACCATTGCT  | 511                   |
| HPV58           | AGTCCCTCCGTAGCAGAAAG  | CTGCACATAACGCCACAGTC  | 500                   |
| HPV59           | GGTGGCAGAACAGGGTACAT  | CTGTTGGATTGGGGGTACTG  | 454                   |
| HPV61           | AATCCGTGCAGGAAGCAGAG  | ATACACCTCGCTGGCGTTTC  | 518                   |
| G3PDH           | GATCATCAGCAATGCCTCCT  | GCTTGACAAAGTGGTCGTTG  | 494                   |
